# Supplementary material
Source: MDPI journal article supplement (https://www.mdpi.com/2409-515X/9/4/60)
Supplement: s1 [file s1]

Table S1 - Complete list of OMIM numbers, names of diseases, and their incidence

| Disease     | Full name                                                                                     | OMIM                                   | Incidence   |
|-------------|-----------------------------------------------------------------------------------------------|----------------------------------------|-------------|
| PKU/HPA     | Phenylketonuria/ Hyperphenylalaninemia                                                        | 261600/ 233910                         | 1 : 6 500   |
| MSUD        | Maple syrup urine disease                                                                     | 248600                                 | 1: 185 000  |
| MCAD        | Medium-chain acyl-CoA dehydrogenase deficiency                                                | 201450                                 | 1 : 18 712  |
| LCHAD       | Long-chain 3-hydroxyacyl-coenzyme A dehydrogenase deficiency                                  | 609016                                 | 1 : 56 136  |
| VLCAD       | Very long-chain acyl-CoA dehydrogenase deficiency                                             | 201475                                 | 1 : 280 680 |
| CPT I       | Carnitine palmitoyl transferase I deficiency                                                  | 255120, 616282                         | rare        |
| CPT II/CACT | Carnitine palmitoyl transferase II deficiency/ Carnitine-acylcarnitine translocase deficiency | 255110, 608836, 600649, 614212/ 212138 | rare        |
| GA I        | Glutaric aciduria I                                                                           | 231970                                 | 1 : 40 000  |
| IVA         | Isovaleric acidemia                                                                           | 243500                                 | 1 : 230 000 |
| HCY (CBS)   | Homocystinuria due to cystathioine beta-syntase deficiency                                    | 236200                                 | 1 : 100 000 |
| HCY (MTHFR) | Homocystinuria due to deficiency of N(5,10)-methylenetetrahydrofolate reductase activity      | 236250                                 | rare        |
| ARG         | Argininemia                                                                                   | 207800                                 | 1 : 300 000 |
| CIT/ASA     | Citrullinemia/ Argininosuccinic aciduria                                                      | 215700/ 207900                         | 1 : 78 000  |

Source: Novorozenecký screening. [cited 20 Feb 2023].

Available: <https://www.novorozeneckyscreening.cz/>
