# Supplementary material
Source: MDPI journal article supplement (https://www.mdpi.com/2409-515X/9/4/60)

Scree plot ICA

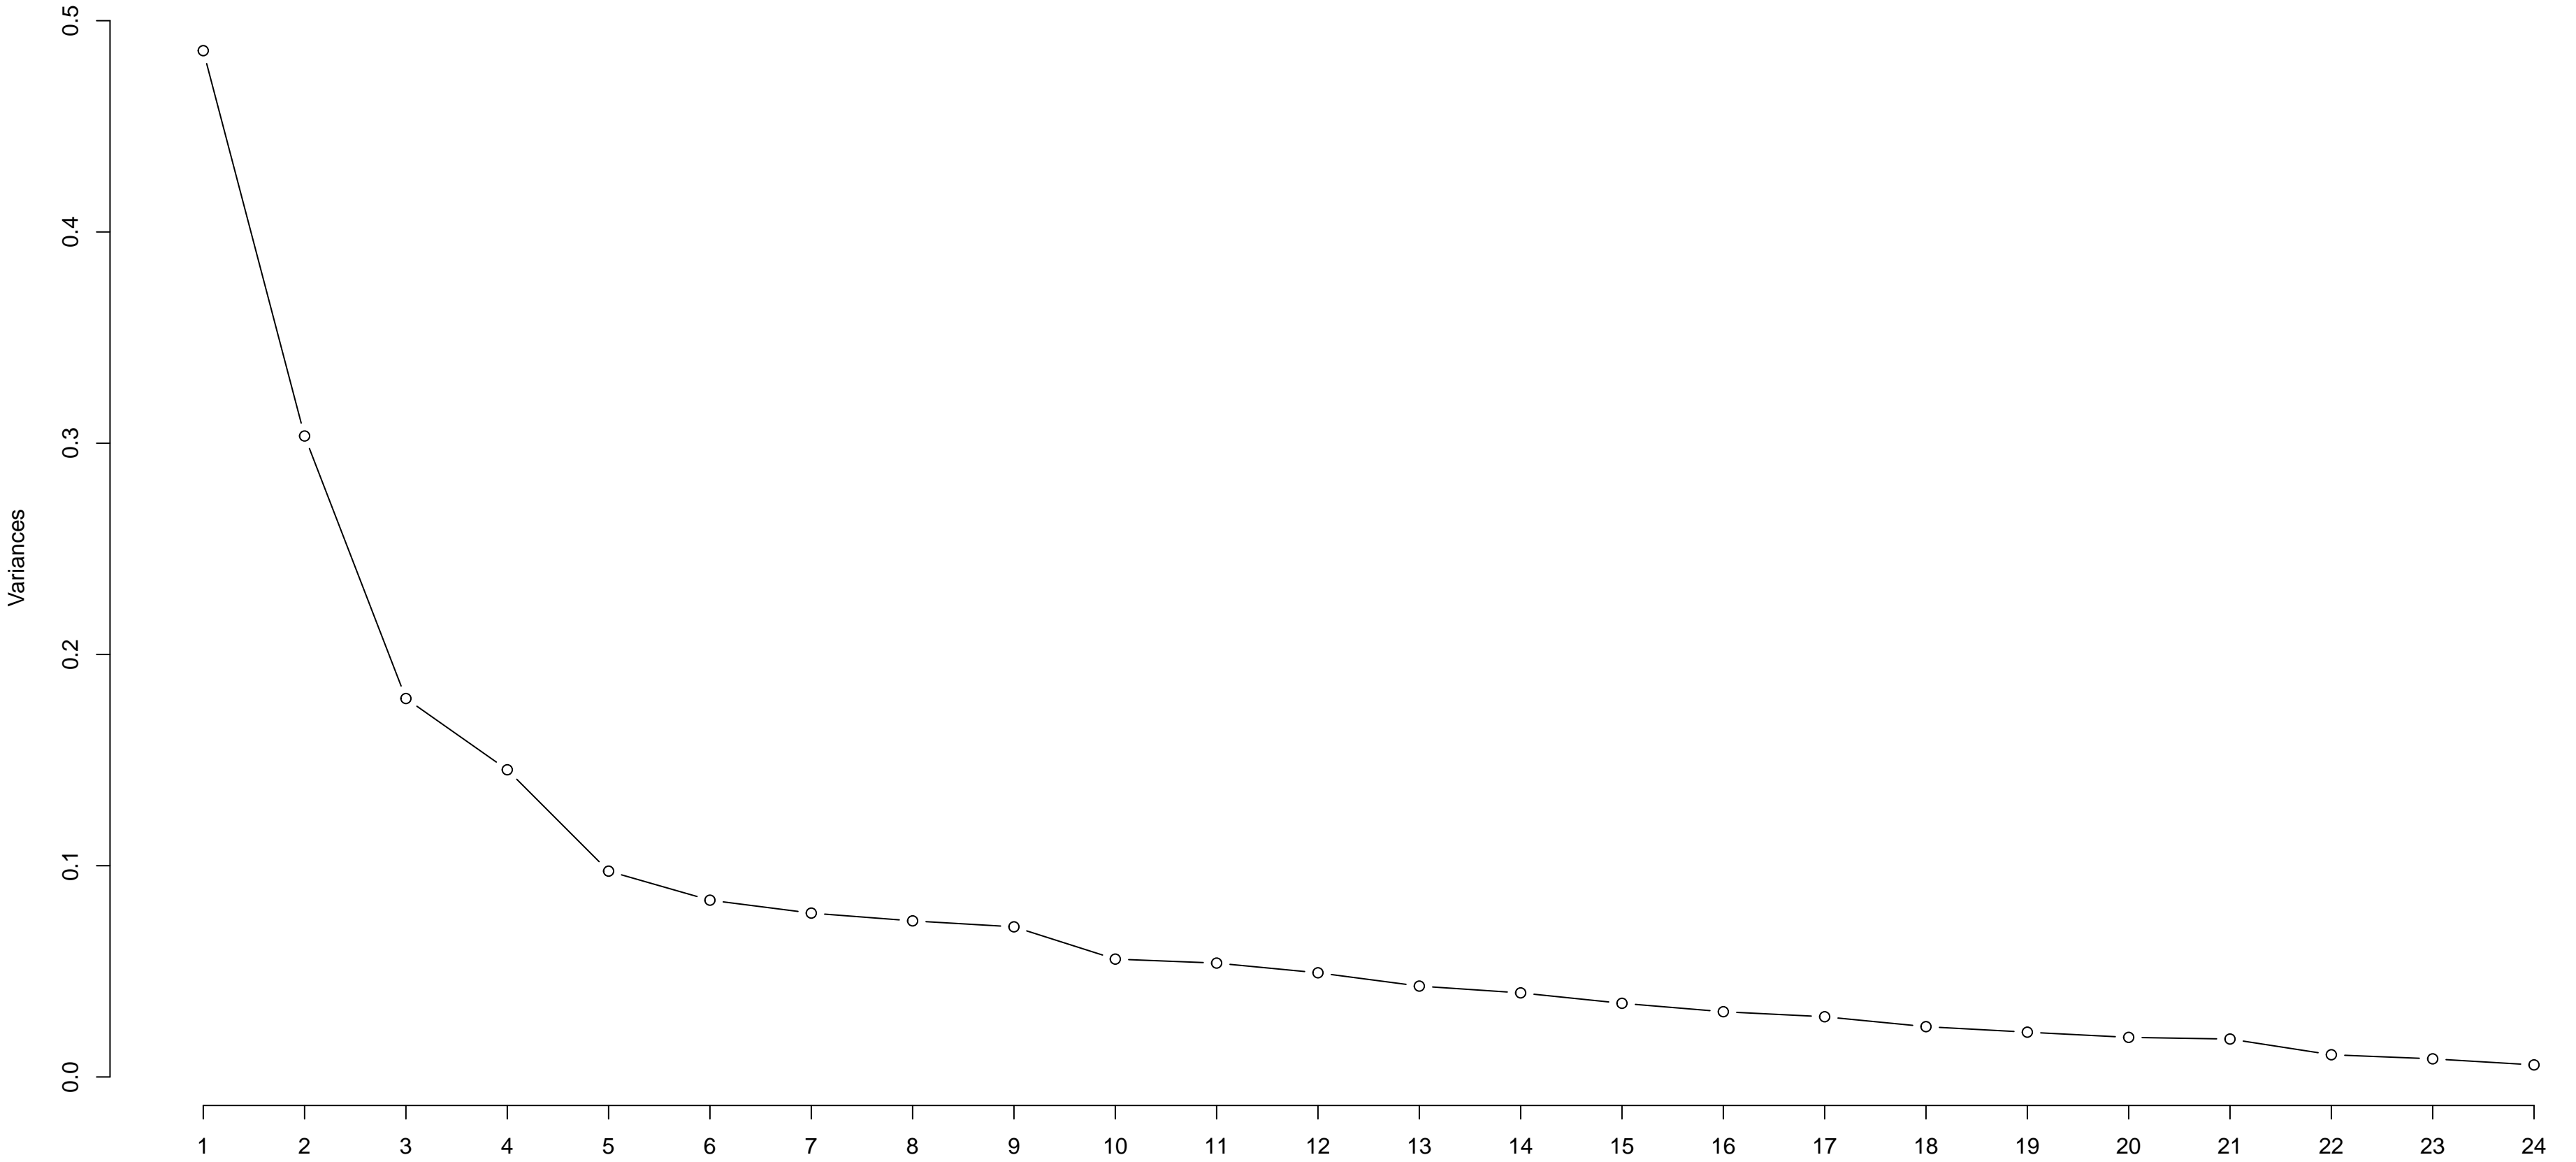

Supplement: s1 [file s1]
